# Supplementary material
Source: publisher site journal article supplement (https://www.dovepress.com/article/292764)
Supplement: Supplementary file 1 [file get_supplementary_file.php]

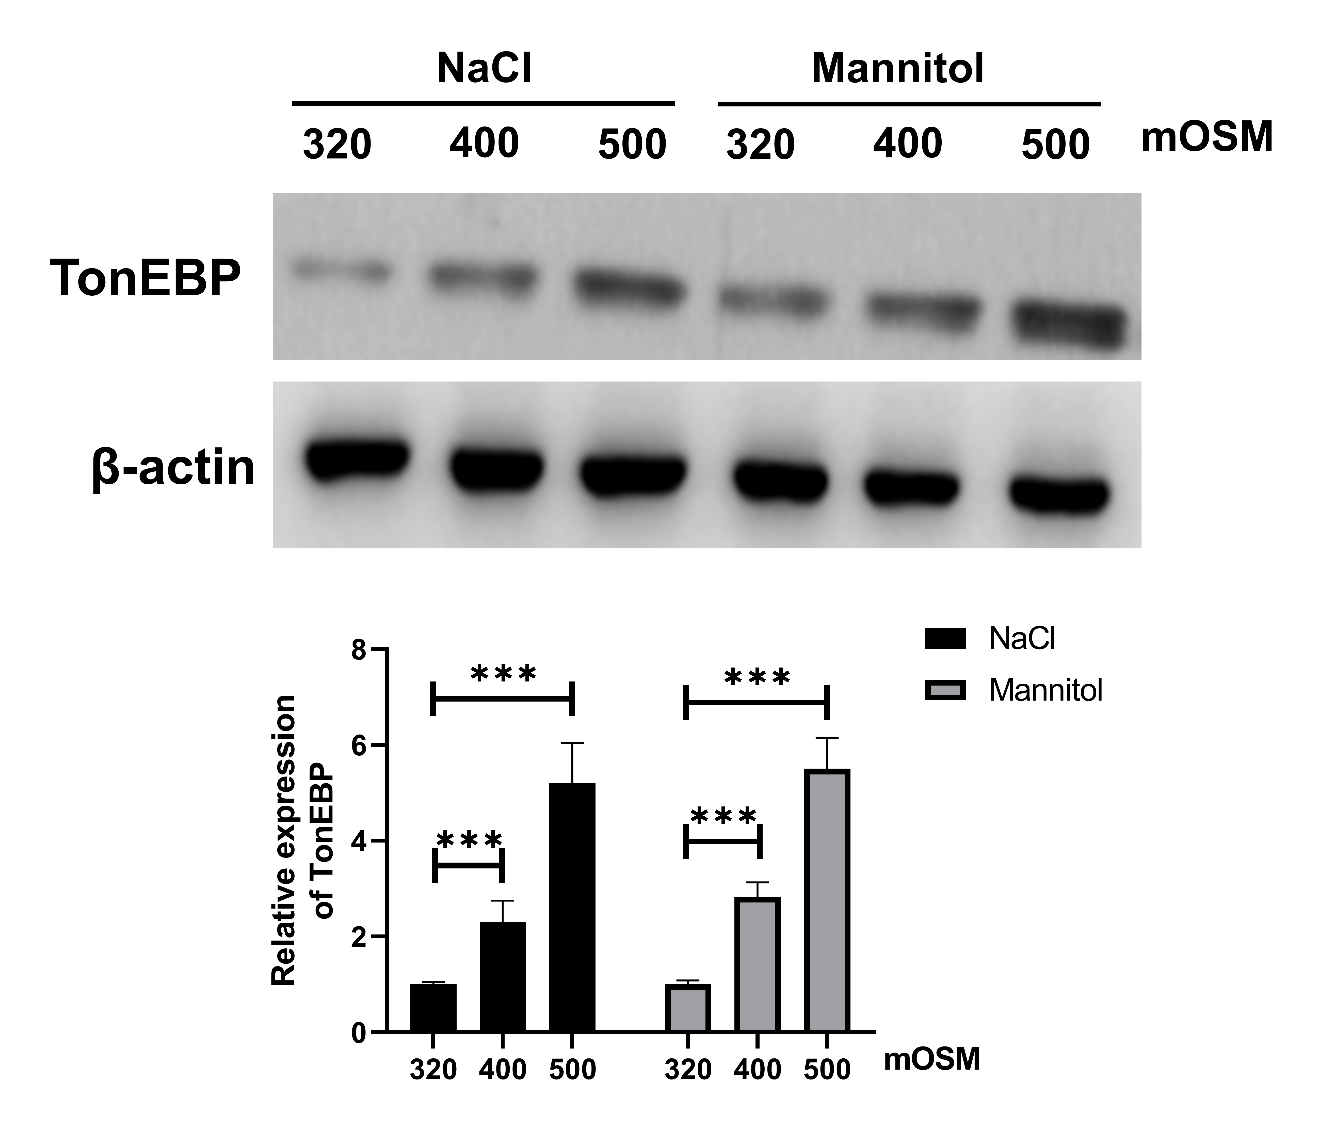


Supplementary Figure 1. The expression of TonEBP in NaCl and mannitol based hyperosmotic culture medium. Normal culture medium (320 mOsm) and hyperosmotic medium (400 and 500 mOsm) were generated with NaCl and mannitol, independently, n=3, data presented as mean ± SD. one-way ANOVA with SNK multiple comparisons test. ***: P<0.001.
